# Supplementary material
Source: publisher figshare collection journal article supplement (https://acs.figshare.com/ndownloader/files/4753498)
Supplement: Supplementary file 1 [file 4753498]

## Physical and Structural Basis for the Strong Interactions of the –ImPy–Central Pairing Motif in the Polyamide, f-ImPyIm

Karen L. Buchmueller<sup>1‡</sup>, Suzanna L. Bailey<sup>1</sup>, David A. Matthews<sup>1</sup>, Zarmeen T. Taherbhai<sup>1</sup>, Janna K. Register<sup>2</sup>, Zachary S. Davis<sup>2</sup>, Chrystal D. Bruce<sup>2</sup>, Caroline O'Hare<sup>3</sup>, John A. Hartley<sup>3</sup> and Moses Lee<sup>1†\*</sup>

1. Department of Chemistry, Furman University, Greenville, South Carolina, 29613

2. Department of Chemistry, Erskine College, Due West, South Carolina, 29639

3. Cancer Research UK Drug-DNA Interactions Research Group, Department of Oncology, University College London, London W1W 7BS, U.K.

<sup>†</sup>Current institution: Dean of Natural Sciences, Hope College, Holland, MI 49422.

<sup>‡</sup>Current institution: Department of Chemistry, Wake Forest University, Winston-Salem, NC, 27109

\* To whom correspondence should be addressed: M.L.: tel, (616) 395-7190; fax, (616) 395-7923; e-mail, lee@hope.edu.

Figure S1 - CD and T<sub>M</sub> control experiments for the NMR experiments.

Table S1 - Assignment of DNA base and polyamide protons.

Table S2 - The solvent accessible surface areas (SASA) were calculated with GRASP.

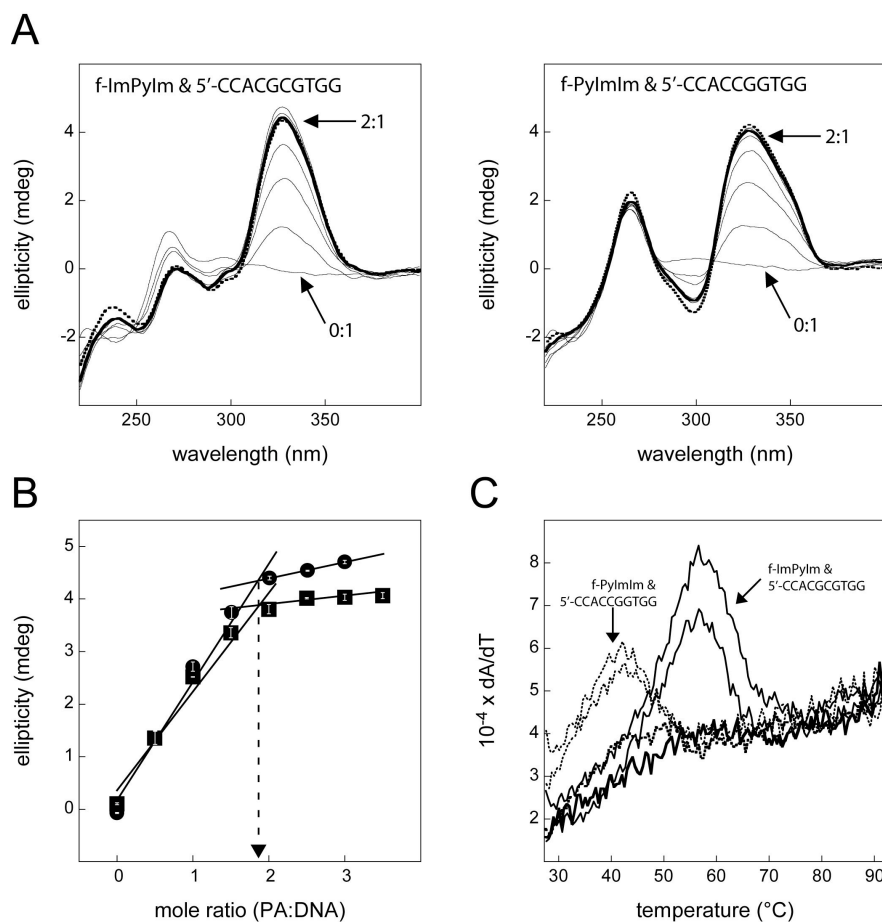

Supplemental Material, Figure S1  
Buchmueller, et al

Figure S1. CD and  $T_M$  control experiments for the NMR experiments. A. Titration of f-ImPyIm into (CGCGnmr)<sub>2</sub> (left panel) and f-PyImIm into (CCGGMmr)<sub>2</sub> (right panel). Solid lines indicate the titration of fresh triamide into fresh DNA at 0.5:1 mole ratio increments until 2:1 and 2.5:1 (thick solid lines) were reached for f-ImPyIm and f-PyImIm, respectively. Spectra from samples taken from the NMR tubes are overlaid (dashed lines). These samples were diluted so that the DNA concentration was  $\sim 9 \mu\text{M}$ . B. Induced peak ellipticity as a function of triamide to DNA ratio. Circles are f-ImPyIm: (CGCGnmr)<sub>2</sub> and squares are f-PyImIm: (CCGGMmr)<sub>2</sub>. The arrow indicates the ratio at which the DNAs are saturated. C. Thermal denaturation studies with 2:1 f-ImPyIm: (CGCGnmr)<sub>2</sub> (solid lines) and 2.5:1 f-PyImIm: (CCGGMmr)<sub>2</sub> (dashed lines). Thick solid and dashed lines indicate the broad melting of (CGCGnmr)<sub>2</sub> and (CCGGMmr)<sub>2</sub>, respectively. The complex peaks with the higher dA/dT values are from freshly prepared samples and the lower of the two lines are from diluted NMR samples.

Table S1 - Assignment of DNA base and polyamide protons.

S1A. f-ImPyIm & 5'-CCACGCGTGG<sup>a</sup>

| DNA H                          | free (ppm) | bound (ppm) | f-ImPyIm H                               | free (bound) | bound (ppm) |
|--------------------------------|------------|-------------|------------------------------------------|--------------|-------------|
| C <sub>1</sub> H5              | 6.00       | 5.98        | formyl                                   | 8.10         | 8.22        |
| C <sub>1</sub> H6              | 7.81       | 7.81        | Im-H (N-term)                            | 7.12         | 7.68        |
| C <sub>2</sub> H5              | 5.79       | 5.80        | Im-CH <sub>3</sub> (N-term)              | 3.86 or 3.83 | 3.95        |
| C <sub>2</sub> H6              | 7.65       | 7.62        | Py-H (H3*) <sup>b</sup>                  | 6.96         | 7.57        |
| A <sub>3</sub> H2              | 7.90       | 7.81        | Py-H (H5*)                               | 6.65         | 6.96        |
| A <sub>3</sub> H8              | 8.36       | 8.45        | Py-CH <sub>3</sub>                       | 3.70         | 3.94        |
| C <sub>4</sub> H5              | 5.35       | 5.45        | Im-H (C-term)                            | 7.12         | 7.74        |
| C <sub>4</sub> H6              | 7.28       | 7.48        | Im-CH <sub>3</sub> (C-term)              | 3.86 or 3.83 | 3.95        |
| G <sub>5</sub> H8              | 7.90       | 7.91        | CH <sub>2</sub> (β to tail) <sup>c</sup> | 3.92         | 4.09        |
| C <sub>6</sub> H5              | 5.37       | 5.68        | CH <sub>2</sub> (α to tail)              | 3.40         | 3.55        |
| C <sub>6</sub> H6              | 7.32       | 7.10        | N-(CH <sub>3</sub> ) <sub>2</sub>        | 3.00         | 3.04        |
| G <sub>7</sub> H8              | 7.94       | 7.74        |                                          |              |             |
| T <sub>8</sub> CH <sub>3</sub> | 1.53       | 1.64        |                                          |              |             |
| T <sub>8</sub> H6              | 7.19       | 6.82        |                                          |              |             |
| G <sub>9</sub> H8              | 7.85       | 7.80        |                                          |              |             |
| G <sub>9</sub> H8              | 7.85       | 7.80        |                                          |              |             |

S1B. f-PyImIm & 5'-CCACCGGTGG<sup>a</sup>

| DNA H                          | free (ppm) | bound (ppm) |
|--------------------------------|------------|-------------|
| C <sub>1</sub> H5              | 6.05       | 5.98        |
| C <sub>1</sub> H6              | 7.88       | 7.82        |
| C <sub>2</sub> H5              | 5.87       | 5.80        |
| C <sub>2</sub> H6              | 7.73       | 7.64        |
| A <sub>3</sub> H2              | 7.93       |             |
| A <sub>3</sub> H8              | 8.40       | 8.45        |
| C <sub>4</sub> H5              | 5.35       | 5.44        |
| C <sub>4</sub> H6              | 7.37       | 7.68        |
| C <sub>5</sub> H5              | 5.89       | 6.09        |
| C <sub>5</sub> H6              | 7.71       | 7.96        |
| G <sub>6</sub> H8              | 7.96       |             |
| G <sub>7</sub> H8              | 7.75       |             |
| T <sub>8</sub> CH <sub>3</sub> | 1.46       | 1.61        |
| T <sub>8</sub> H6              | 7.20       |             |
| G <sub>9</sub> H8              | 7.86       |             |
| G <sub>9</sub> H8              | 7.86       |             |

a. The DNA is sequentially numbered from 5' to 3'.

b. The asterisk indicates protons from pyrrole moieties.

c. The tail is the dimethylamino moiety.

Table S2. The solvent accessible surface areas (SASA) were calculated with GRASP (39) using the Cornell et al. radii with a probe radius of 1.7683 Å (40).

|                       | Polar ( $A_p$ )                                                                      | Non-polar ( $A_{np}$ ) | Total ( $A_{total}$ ) |
|-----------------------|--------------------------------------------------------------------------------------|------------------------|-----------------------|
| Complex               | 2244                                                                                 | 1853                   | 4098                  |
| Free ligand 1         | 223                                                                                  | 749                    | 973                   |
| Free ligand 2         | 204                                                                                  | 760                    | 964                   |
| Free DNA              | 2271                                                                                 | 1650                   | 3921                  |
| Change (Δ)            | -454                                                                                 | -1306                  | -1760                 |
| $-\Delta C_{pSASA}^a$ | $-354 \pm 70$ (Eq. 3) <sup>b</sup><br>$-470 \pm 40$ (Eq. 4)<br>$-444 \pm 69$ (Eq. 5) |                        |                       |

a. The area unit is Å<sup>2</sup>.

b. The  $-\Delta C_{pSASA}$  values (cal/(mole\_K)) are for two ligands. Reported  $-\Delta C_p = -\Delta C_{pSASA} / 2$ .
